# Supplementary material for: Juvenile Heat Tolerance in Wheat for Attaining Higher Grain Yield by Shifting to Early Sowing in October in South Asia
Source: MDPI journal article supplement (doi:10.3390/genes12111808), 2021-11-18
Supplement: s1 [file s1]

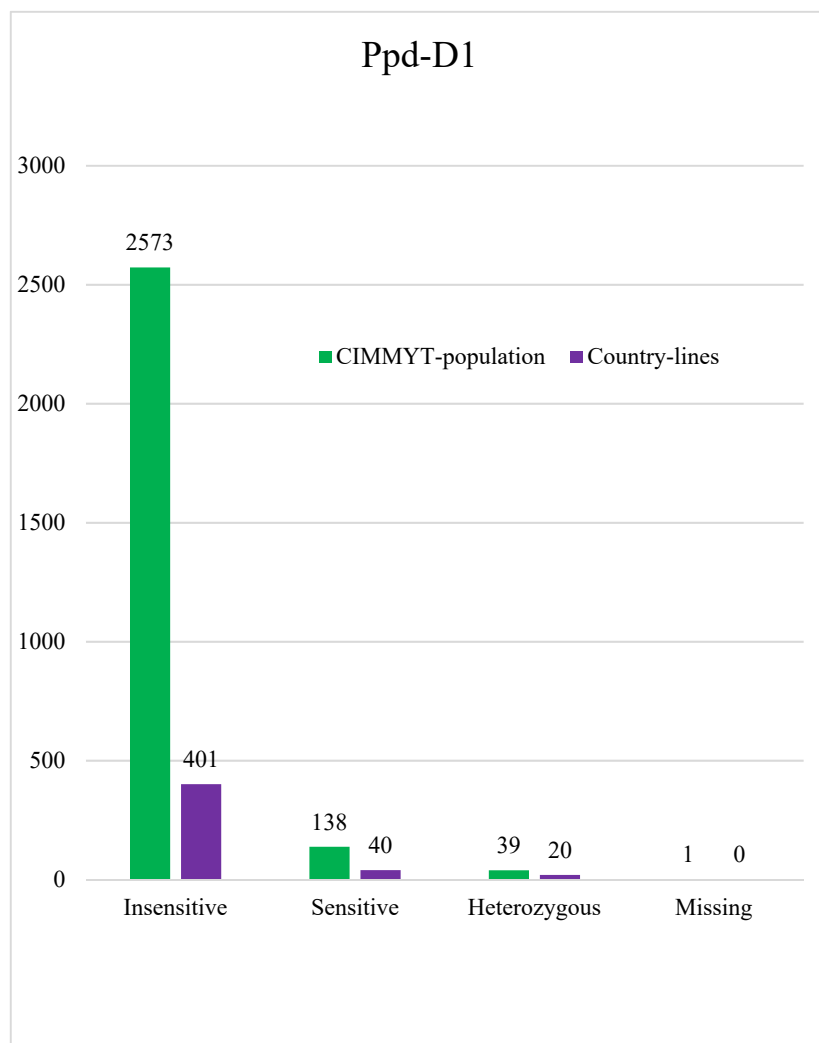

**Figure S1.** Genotyping results for *Ppd-D1*

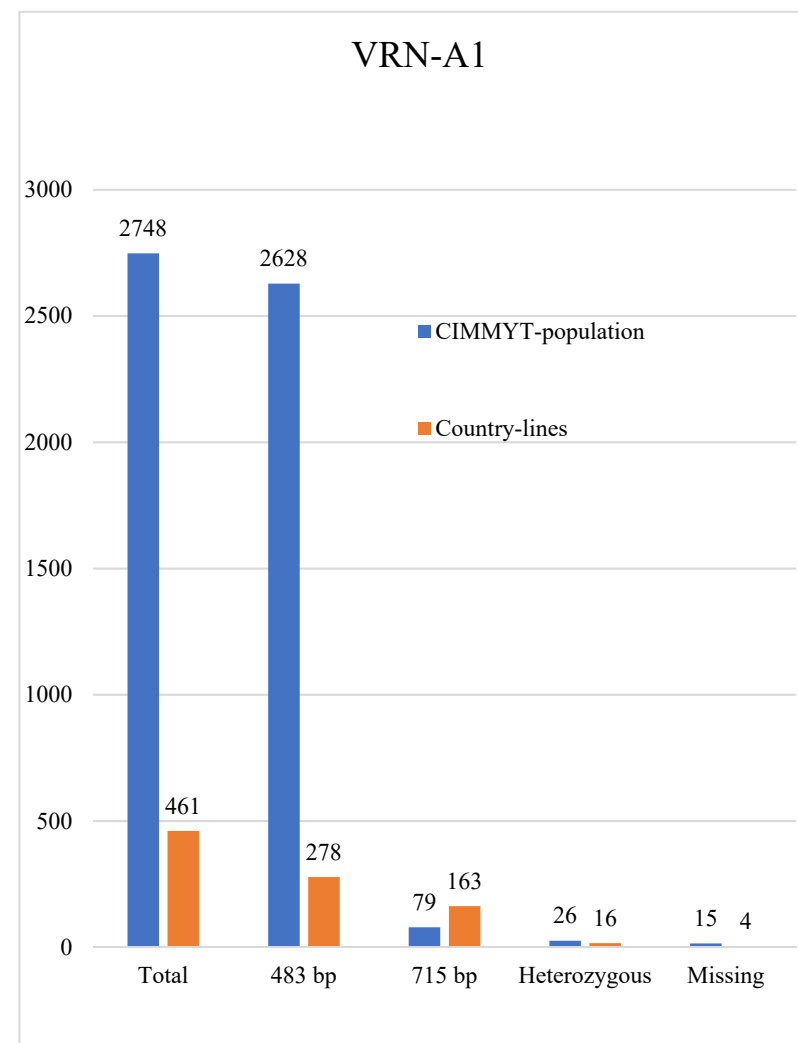

**Figure S2.** Genotyping results for *Vrn-A1*

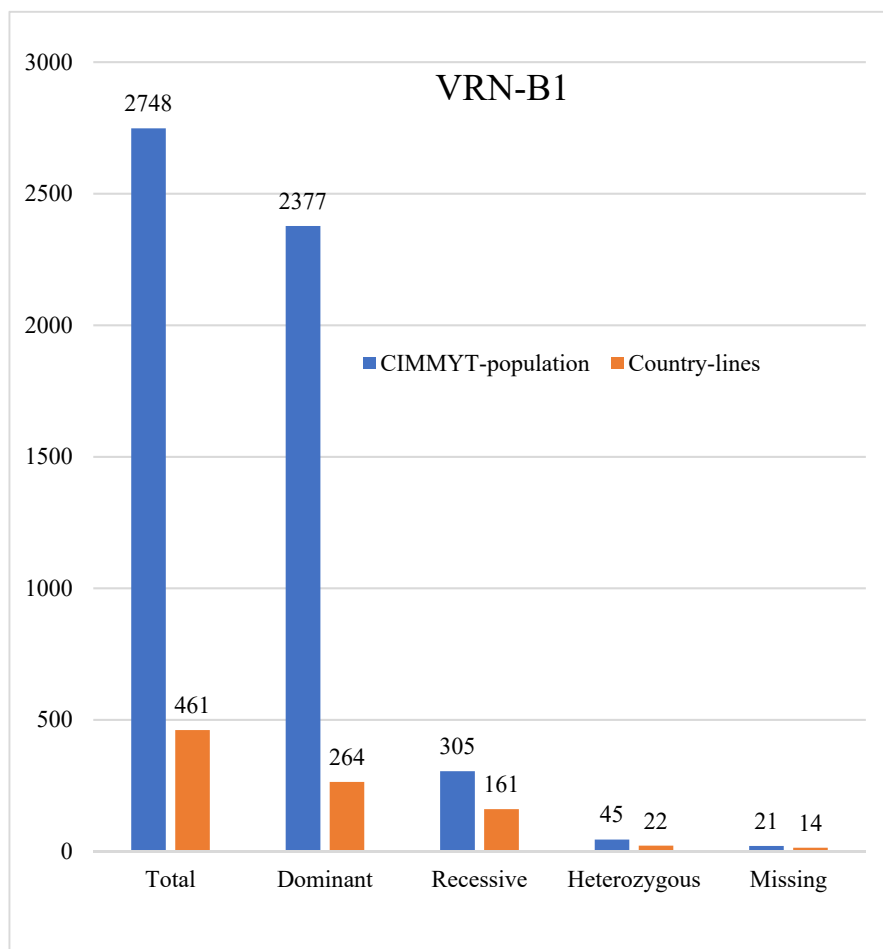

**Figure S3. Genotyping results for Vrn-B1**

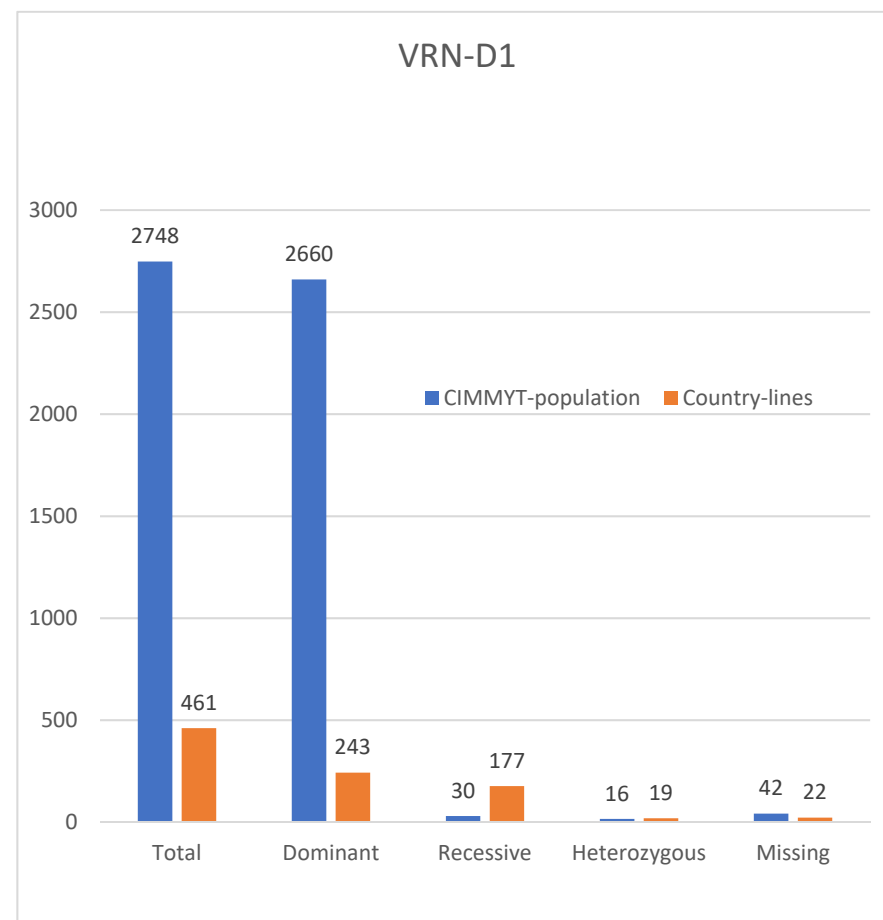

**Figure S4. Genotyping results for Vrn-D1**

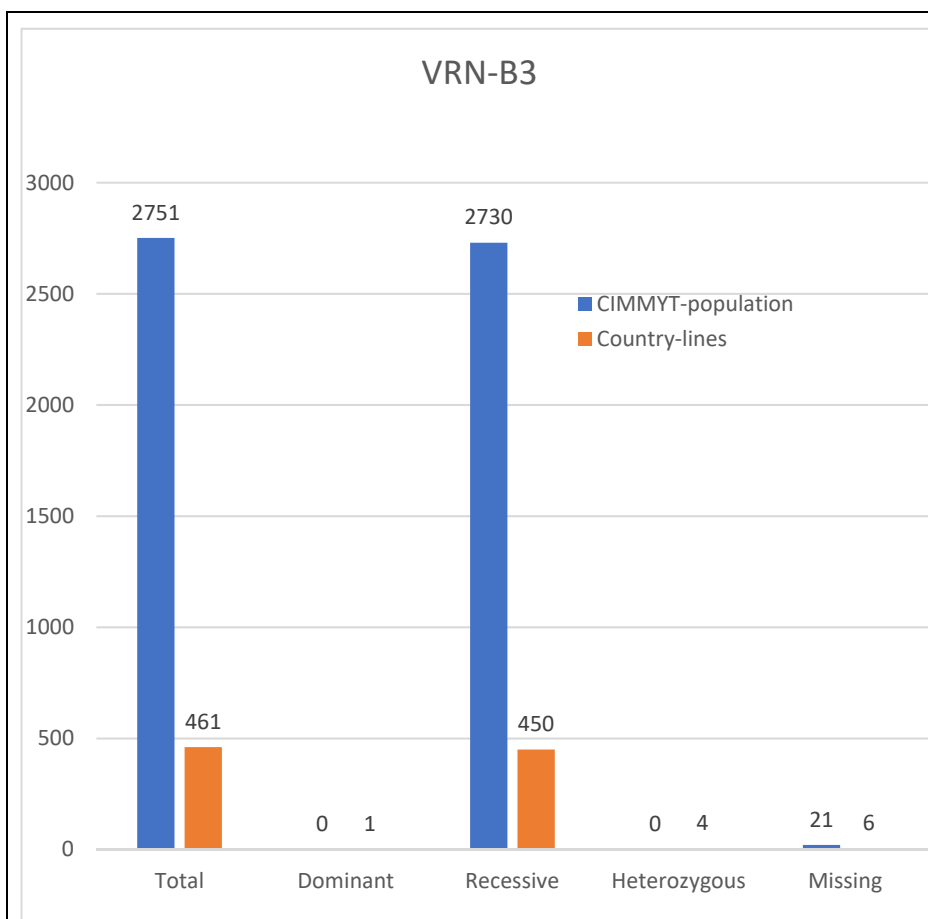

**Figure S5. Genotyping results for Vrn-B3 in CIMMYT and country lines**

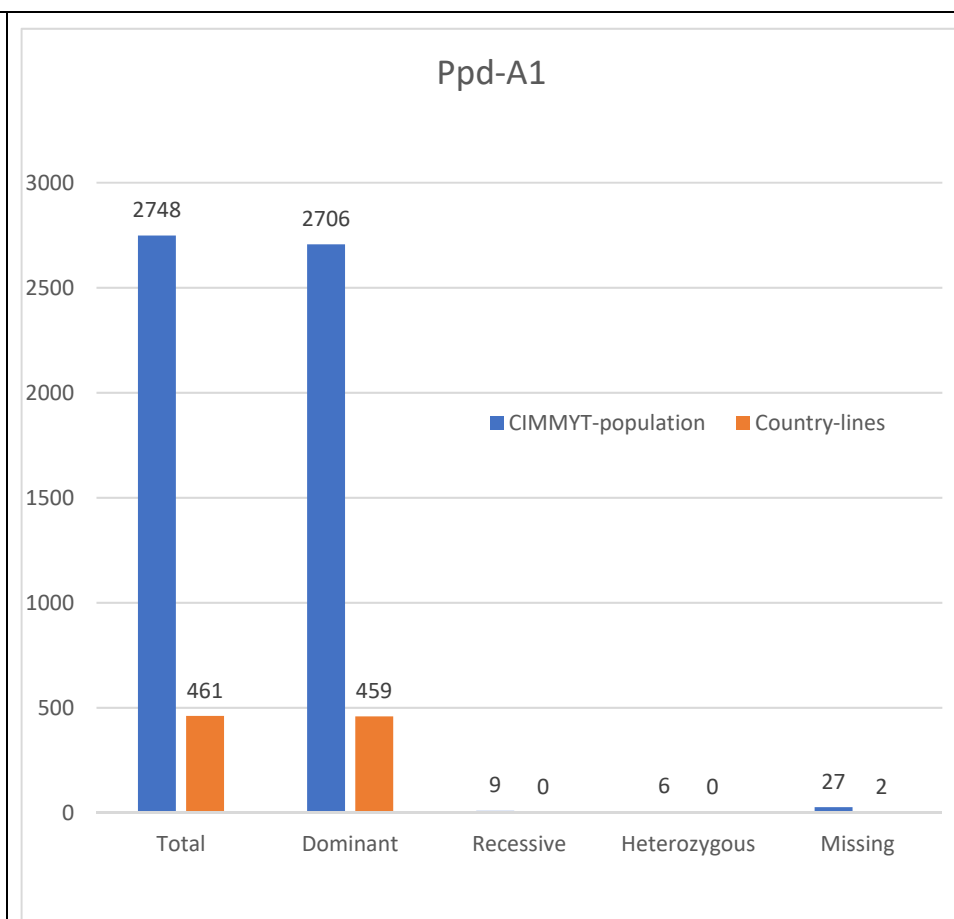

**Figure S6. Genotyping results for Ppd-A1**

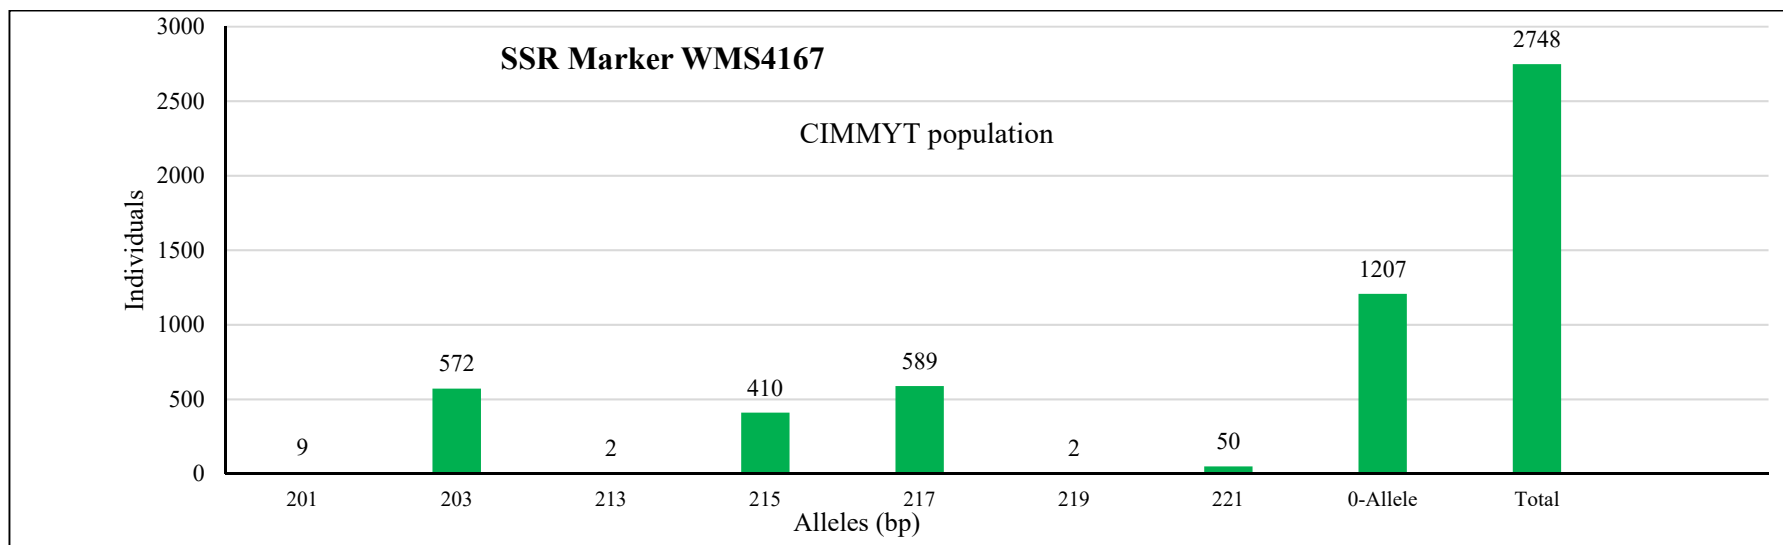

**Figure S7.** Genotyping of SSR-marker WMS4167 (linked to *Ppd-B1*) in the CIMMYT lines

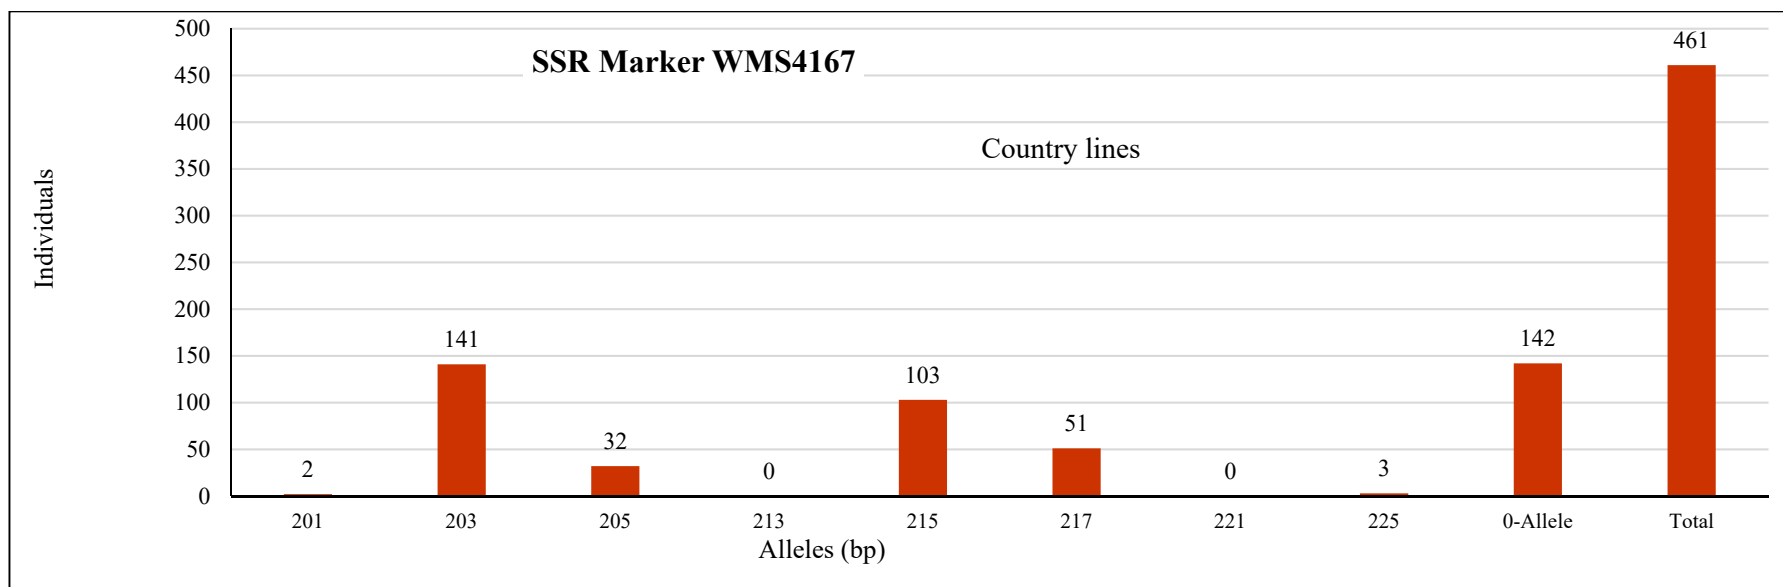

**Figure S8.** Genotyping of SSR-marker WMS4167 (linked to *Ppd-B1*) in the country lines

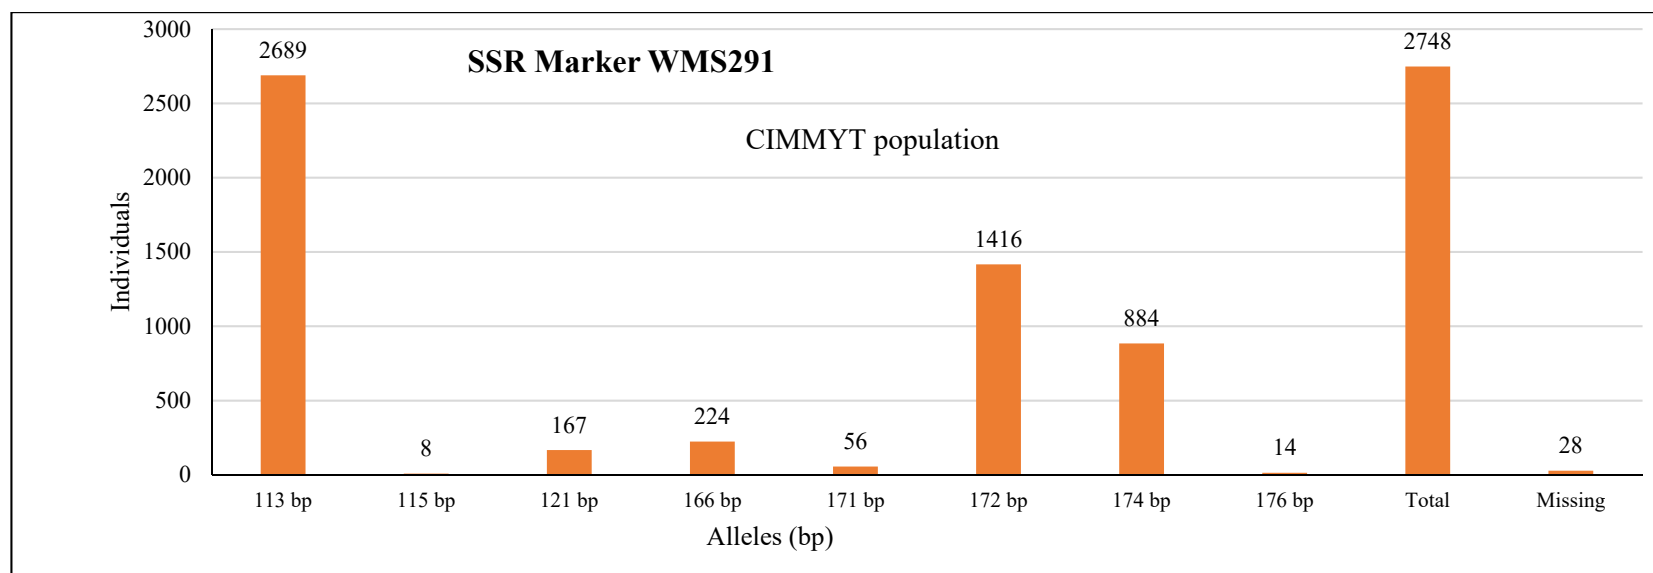

**Figure S9.** Genotyping of SSR-marker WMS291 (linked to *Vrn-A2*) in the CIMMYT lines

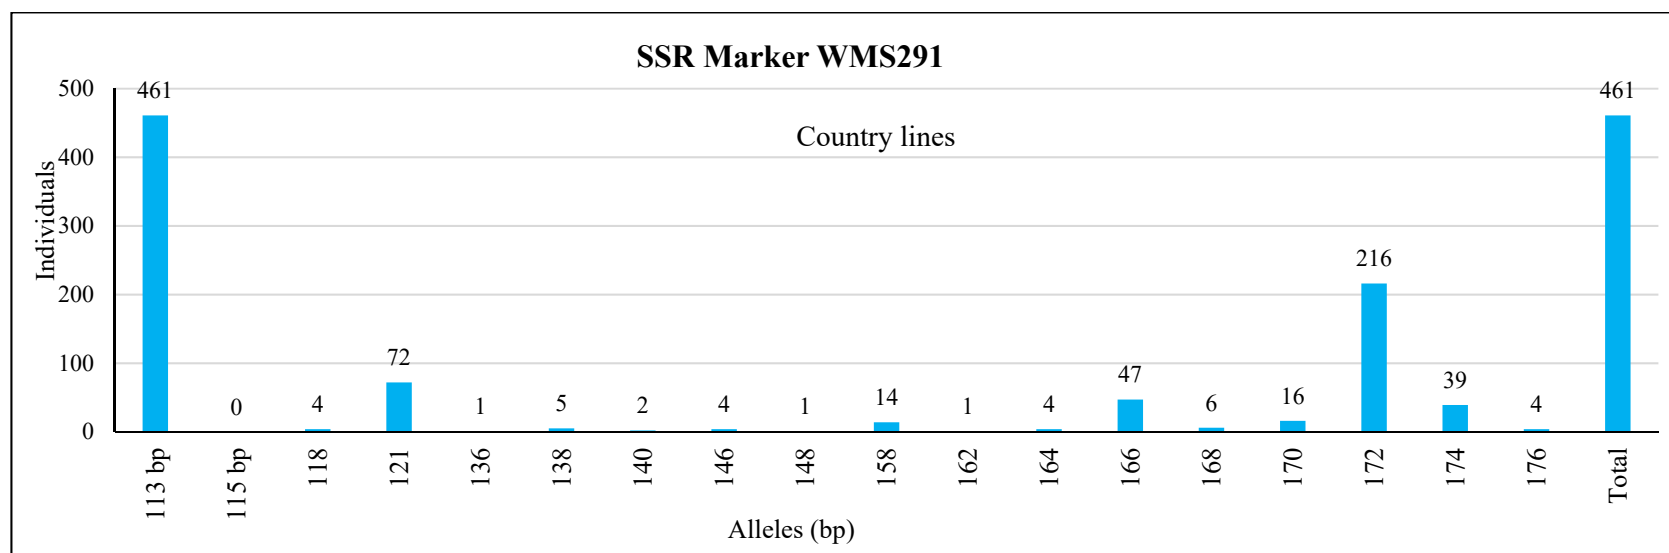

**Figure S10.** Genotyping of SSR-marker WMS291 (linked to *Vrn-A2*) in the country lines

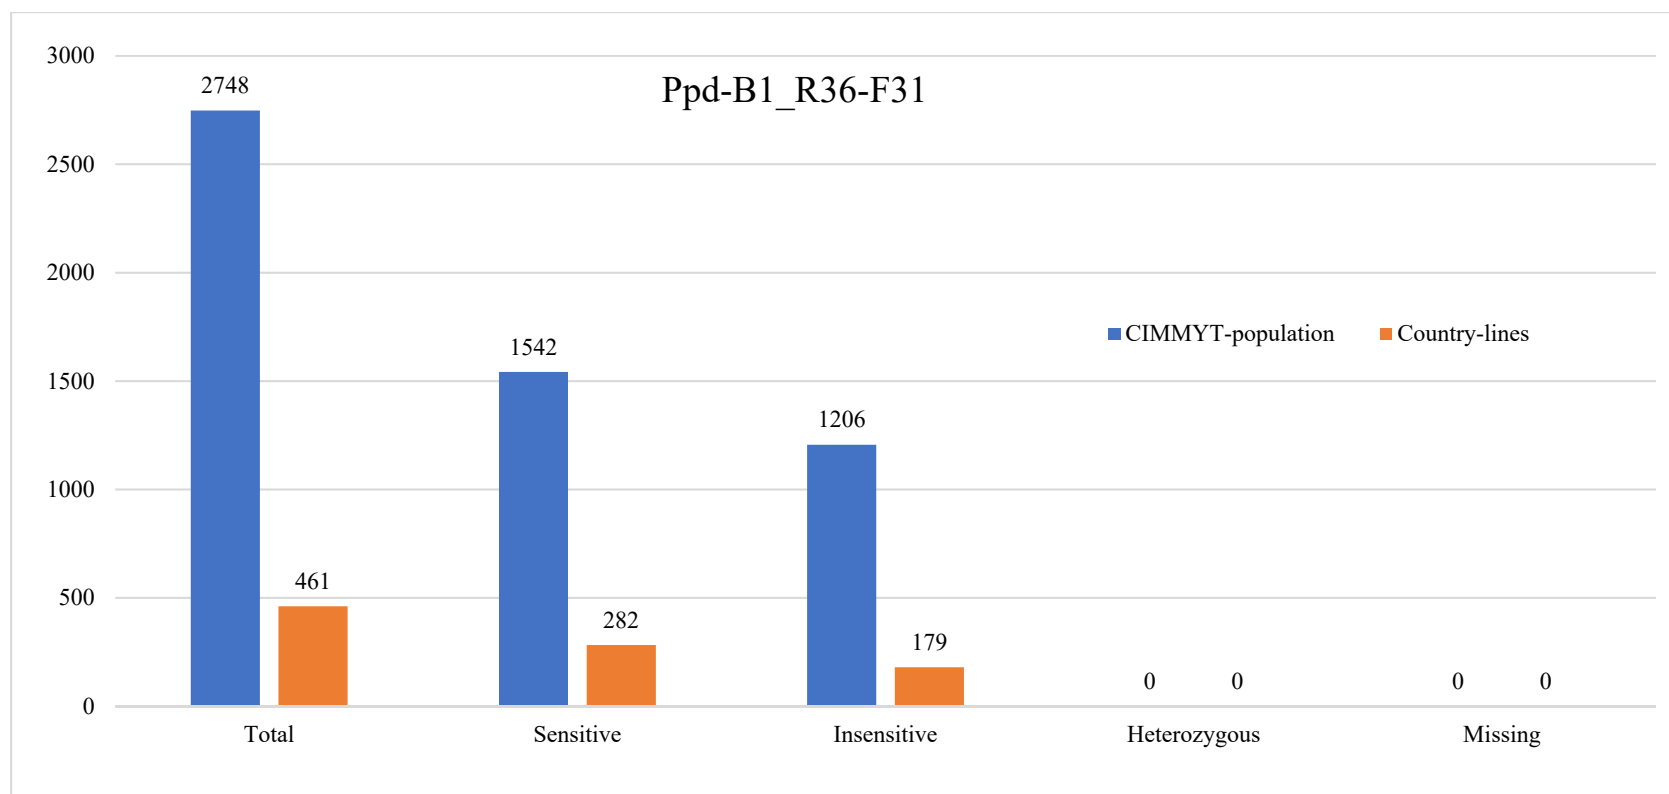

**Figure S11.** Genotyping results for Ppd-B1\_R36-F31

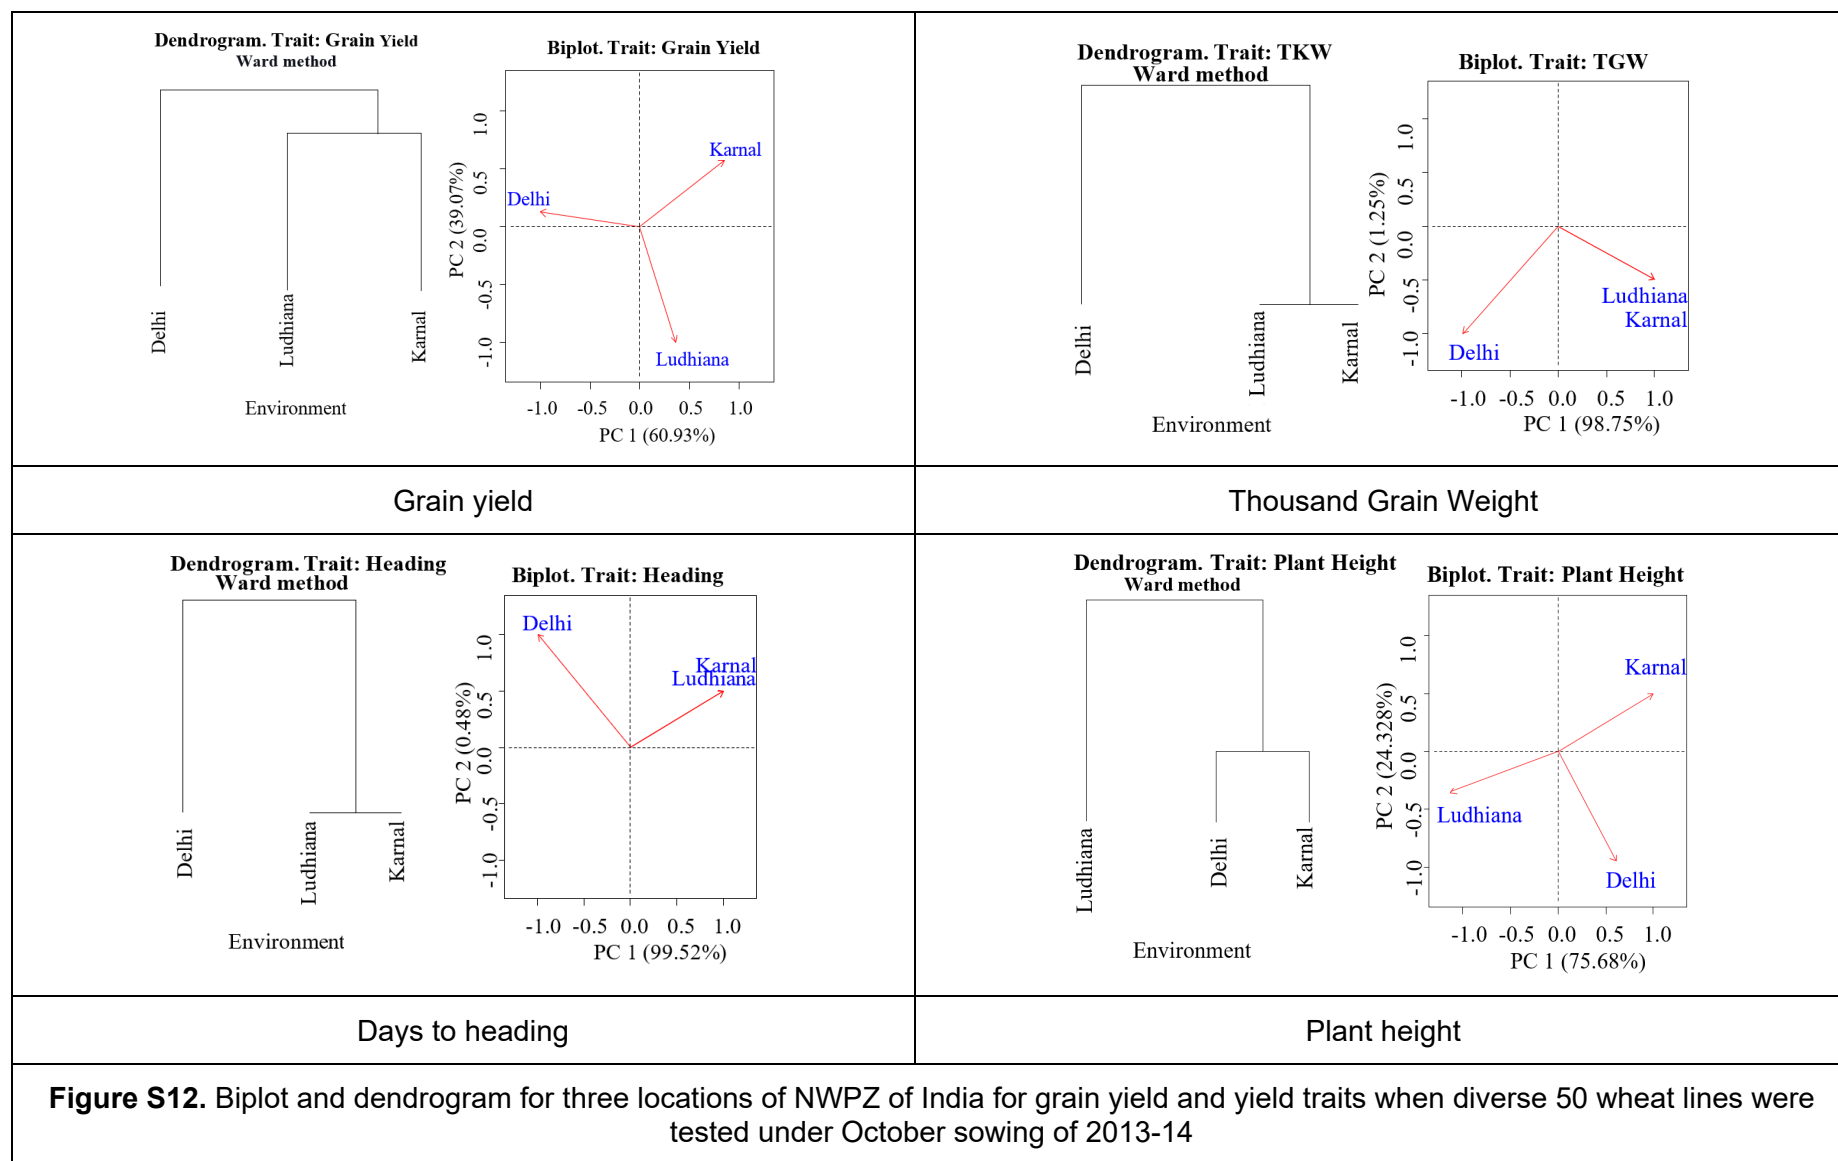

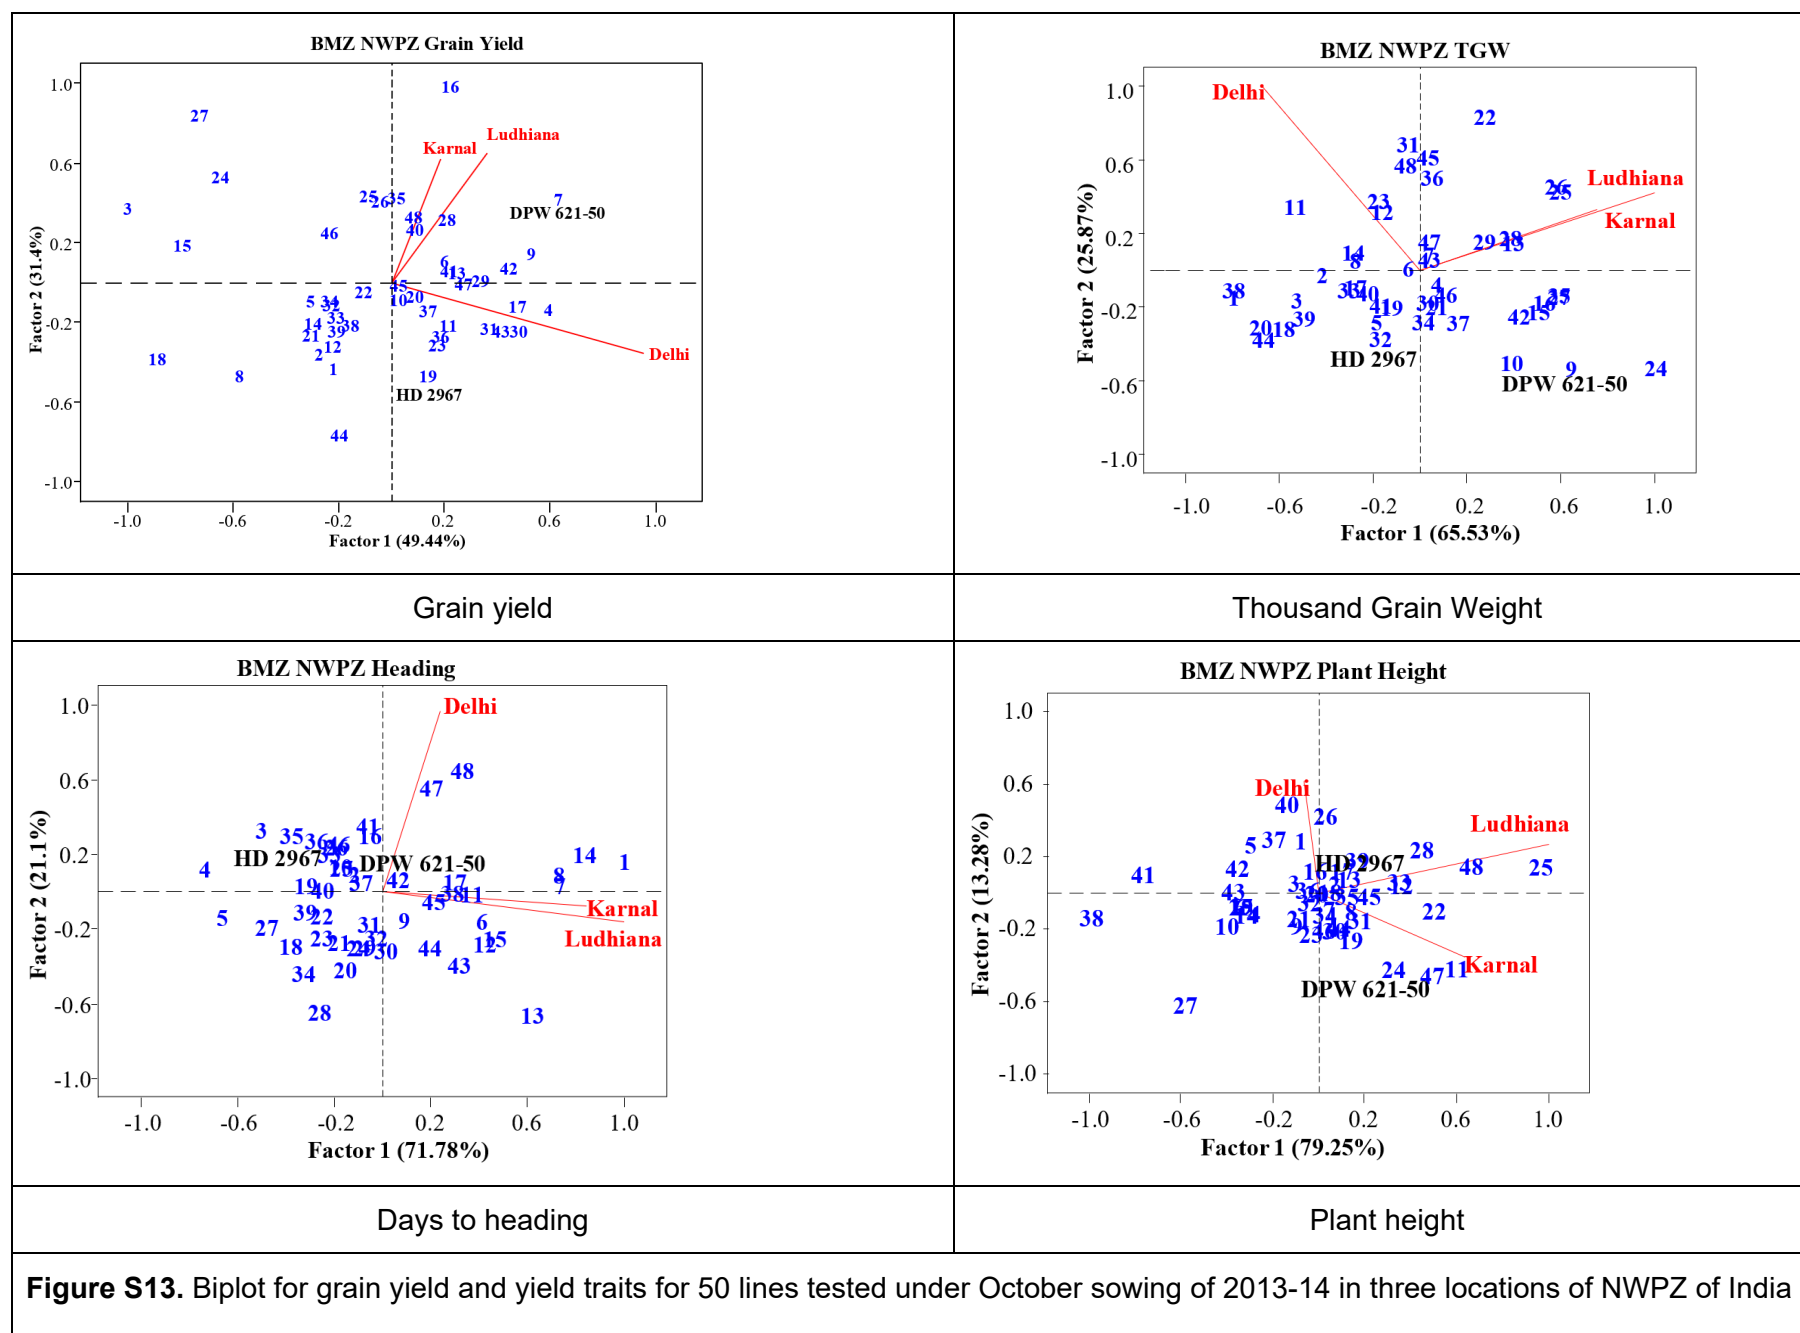



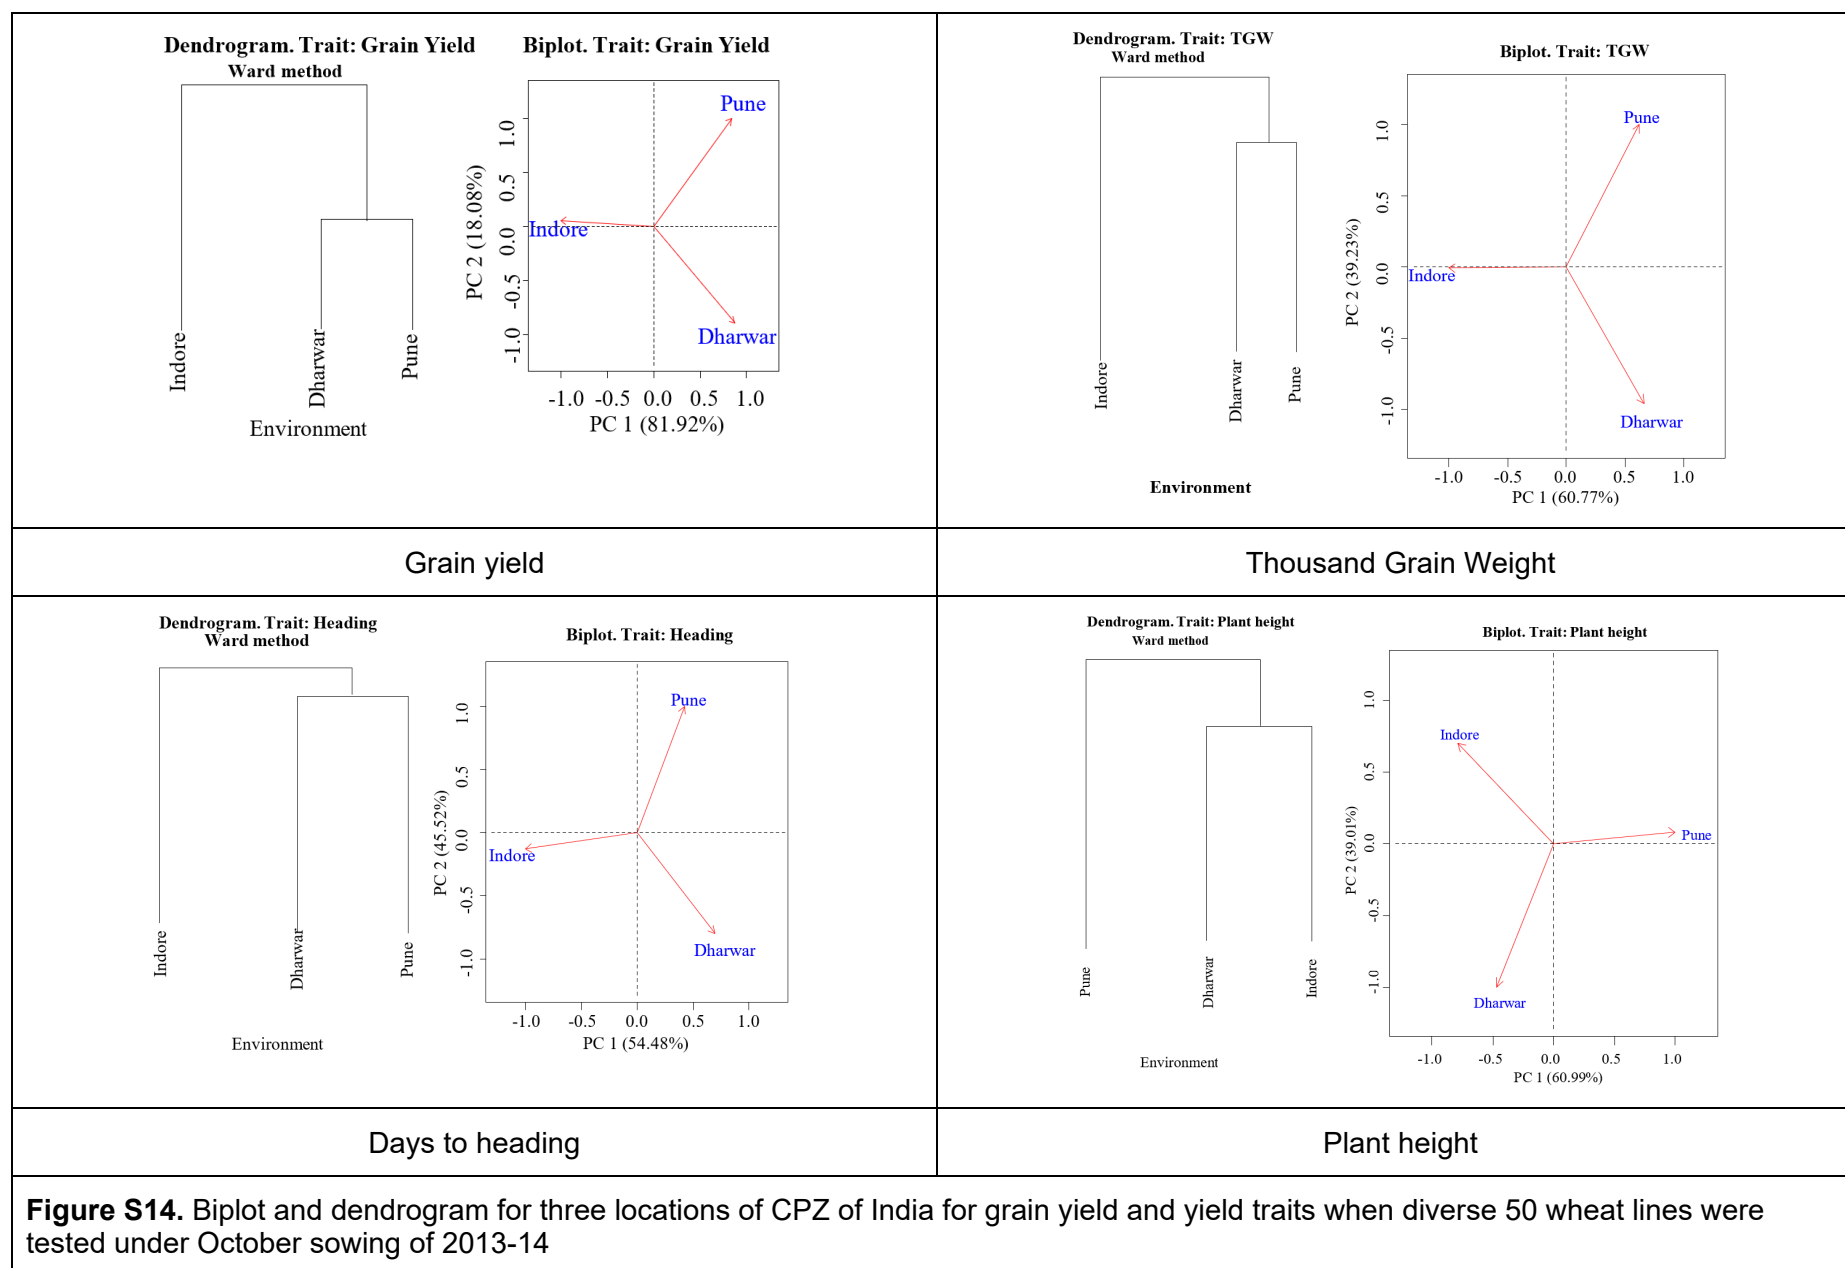

**Figure S14.** Biplot and dendrogram for three locations of CPZ of India for grain yield and yield traits when diverse 50 wheat lines were tested under October sowing of 2013-14

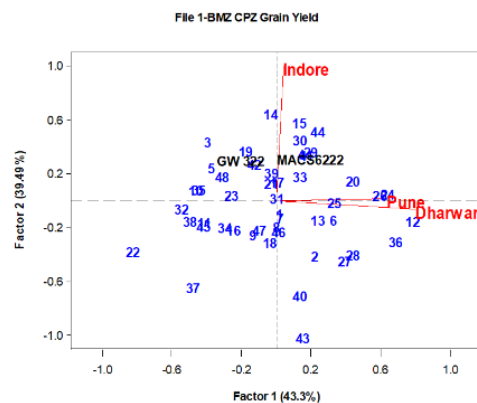

Grain yield

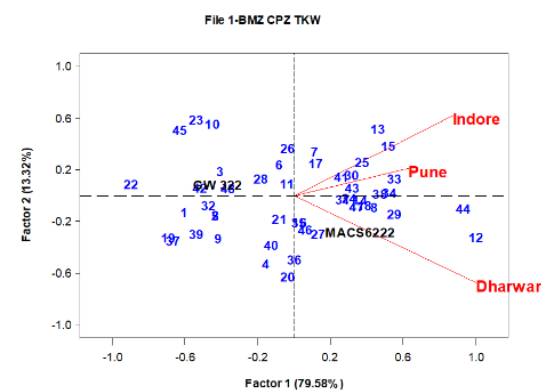

Thousand Grain Weight

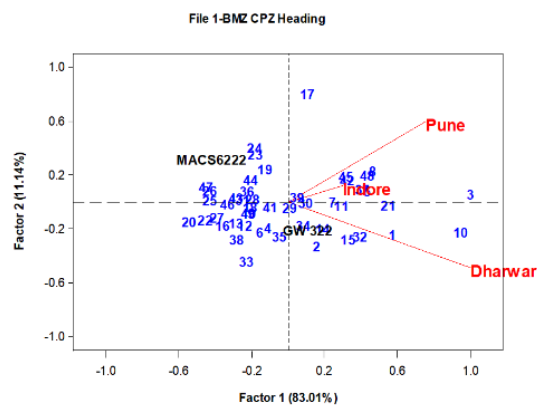

Days to heading

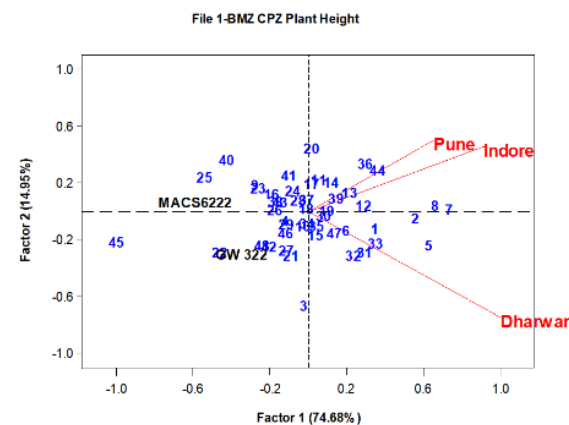

Plant height

**Figure S15.** Biplot for grain yield and yield traits for 50 lines tested under October sowing in three locations of CPZ of India in 2013-14

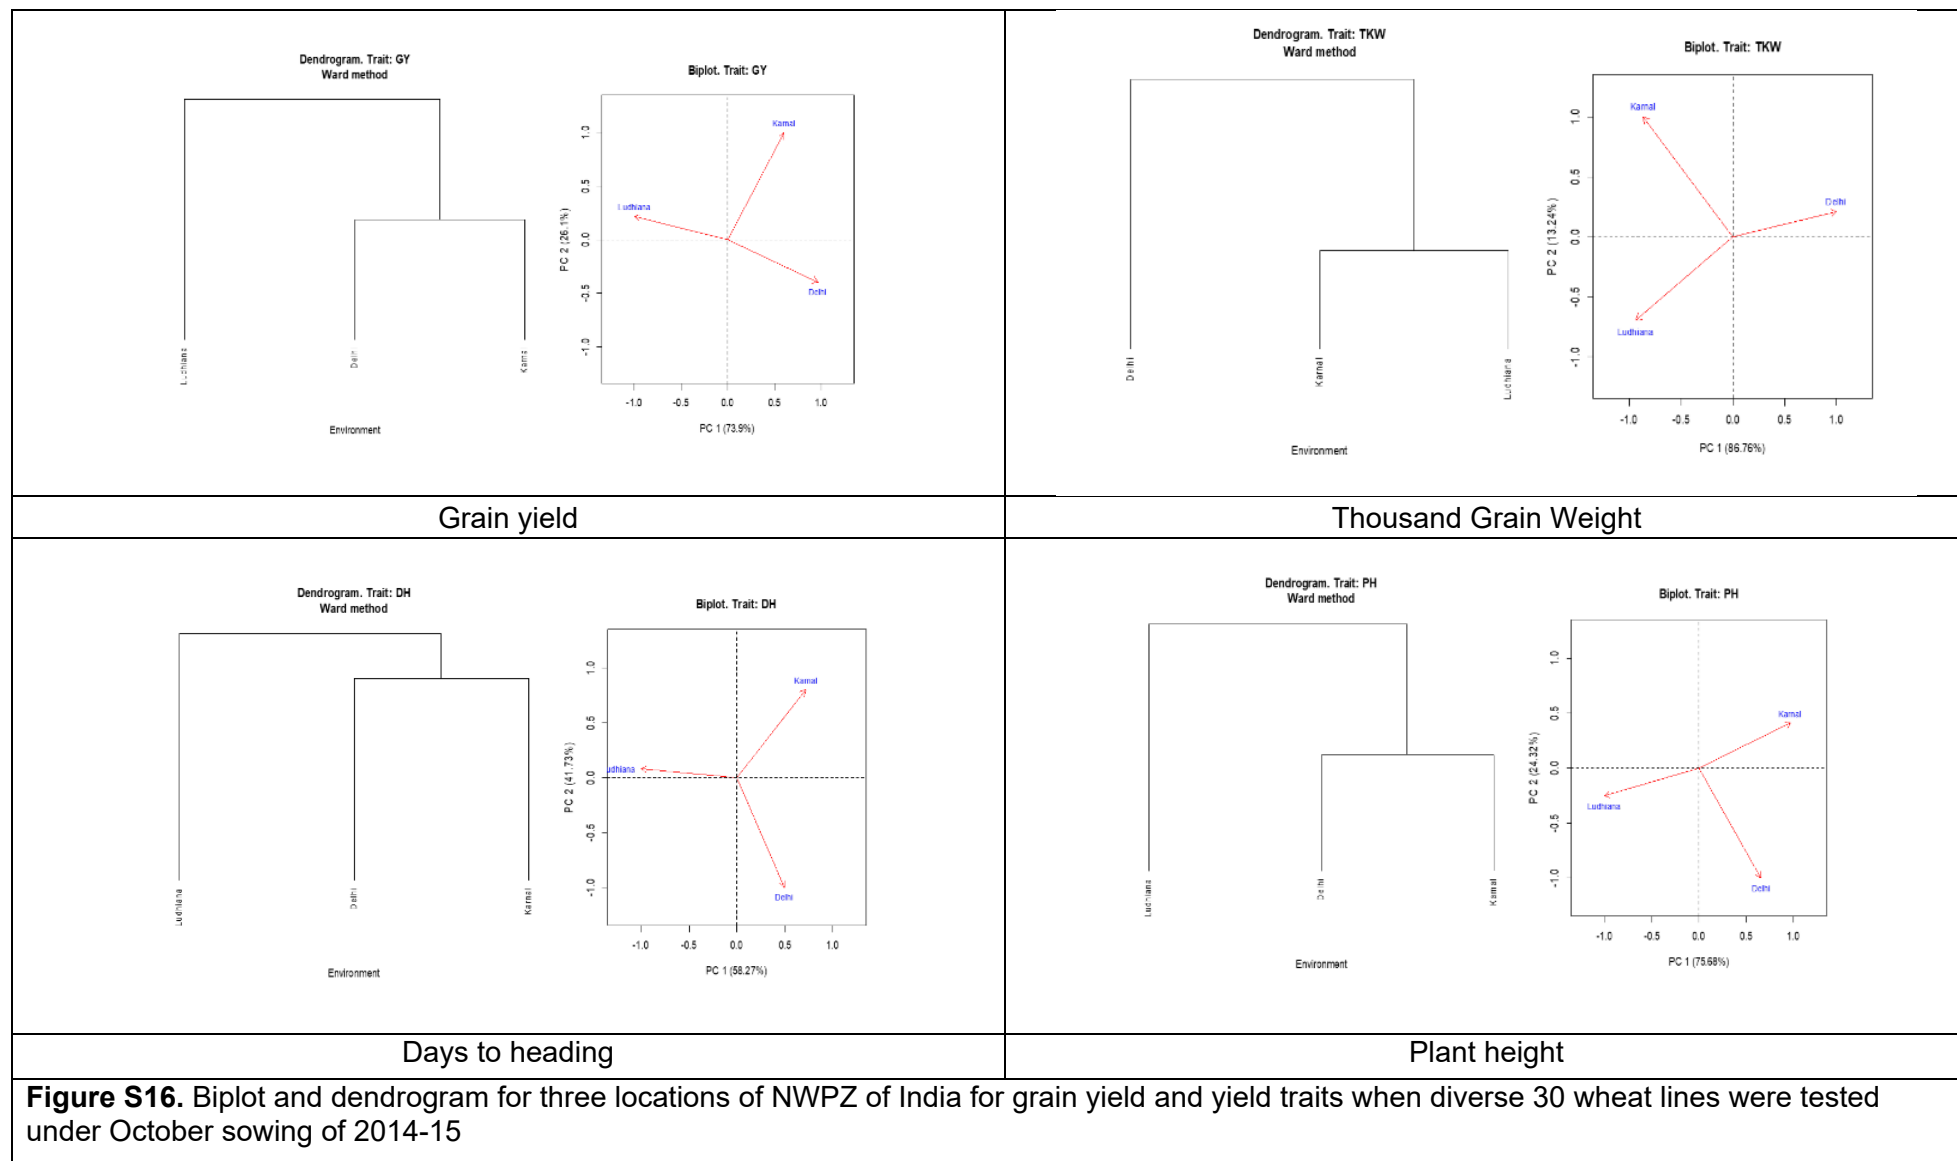

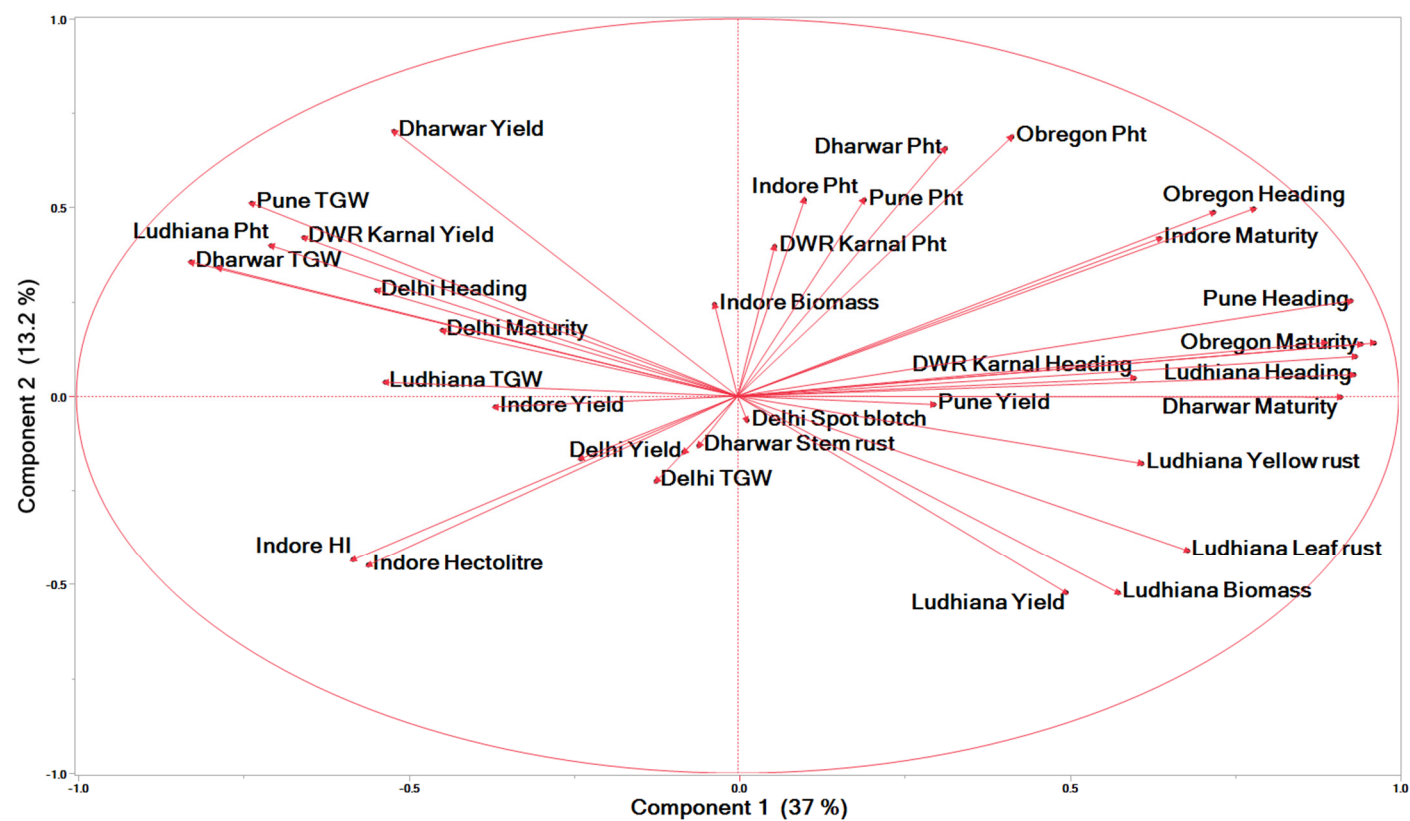

Figure S17: PCA plot of the traits in the different environments

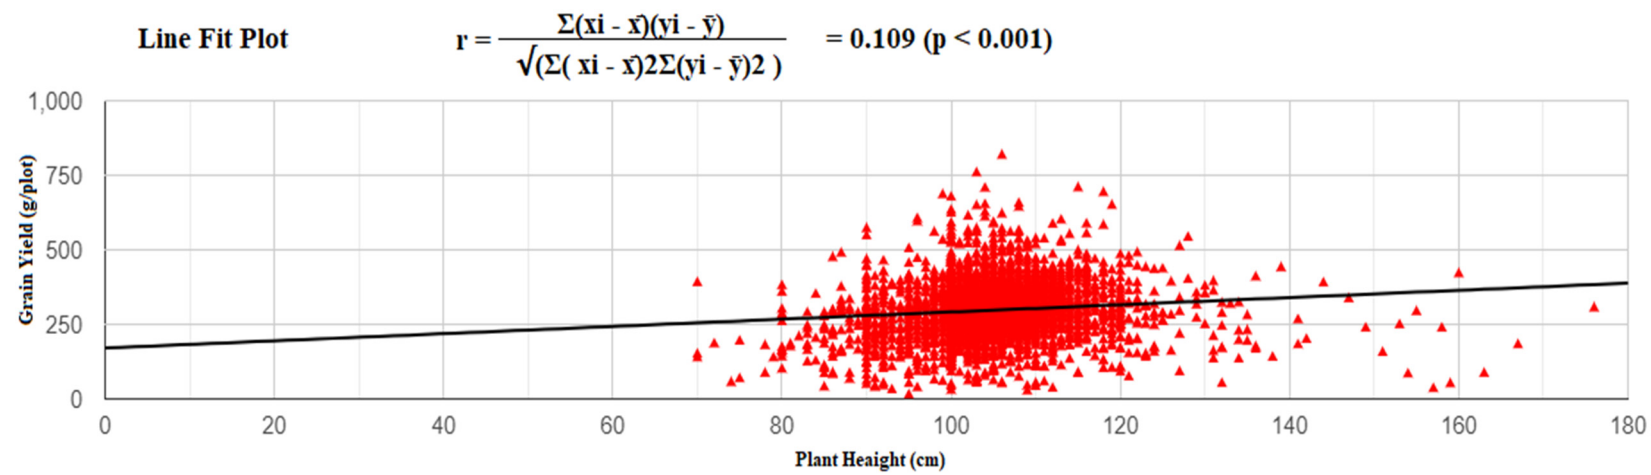

**Figure S18** Line Fit Plot for plant height and grain yield for 3222 lines evaluated under early sown condition

Table S1: Details of lines with pedigree, origin source, selection history, unique GID and other information.

|              | CIMMYT-population |         | Country-lines |         |
|--------------|-------------------|---------|---------------|---------|
| Ppd-D1       |                   |         |               |         |
| Total        | 2748              | 100%    | 461           | 100.00% |
| Insensitive  | 2573              | 93.60%  | 401           | 86.99%  |
| Sensitive    | 138               | 5.02%   | 40            | 8.68%   |
| Heterozygous | 39                | 1.42%   | 20            | 4.34%   |
| Missing      | 1                 | 0.04%   | 0             | 0.00%   |
| VRN-A1       |                   |         |               |         |
| Total        | 2748              | 100%    | 461           | 100%    |
| Insensitive  | 2628              | 95.63%  | 278           | 60.30%  |
| Sensitive    | 79                | 2.87%   | 163           | 35.36%  |
| Heterozygous | 26                | 0.95%   | 16            | 3.47%   |
| Missing      | 15                | 0.55%   | 4             | 0.87%   |
| VRN-B1       |                   |         |               |         |
| Total        | 2748              | 100%    | 461           | 100.00% |
| Insensitive  | 2377              | 86.50%  | 264           | 57.27%  |
| Sensitive    | 305               | 11.10%  | 161           | 34.92%  |
| Heterozygous | 45                | 1.64%   | 22            | 4.77%   |
| Missing      | 21                | 0.76%   | 14            | 3.04%   |
| VRN-D1       |                   |         |               |         |
| Total        | 2748              | 100%    | 461           | 100.00% |
| Insensitive  | 2660              | 96.80%  | 243           | 52.71%  |
| Sensitive    | 30                | 1.09%   | 177           | 38.39%  |
| Heterozygous | 16                | 0.58%   | 19            | 4.12%   |
| Missing      | 42                | 1.53%   | 22            | 4.77%   |
| VRN-B3       |                   |         |               |         |
| Total        | 2748              | 100%    | 461           | 100.00% |
| Insensitive  | 2751              | 100.11% | 1             | 0.22%   |
| Sensitive    | 0                 | 0.00%   | 450           | 97.61%  |
| Heterozygous | 2730              | 99.34%  | 4             | 0.87%   |
| Missing      | 0                 | 0.00%   | 6             | 1.30%   |
| Ppd-A1       |                   |         |               |         |
| Total        | 2748              | 100%    | 461           | 100.00% |
| Insensitive  | 2706              | 98.47%  | 459           | 99.57%  |
| Sensitive    | 9                 | 0.33%   | 0             | 0.00%   |
| Heterozygous | 6                 | 0.22%   | 0             | 0.00%   |
| Missing      | 27                | 0.98%   | 2             | 0.43%   |

Table S2: Type, number and frequency of alleles based on DNA analysis of markers associated with Vrn nd Ppd genes

|               | CIMMYT-population |        | Country-lines |         |
|---------------|-------------------|--------|---------------|---------|
| <b>Ppd-D1</b> |                   |        |               |         |
| Total         | 2748              | 100%   | 461           | 100.00% |
| Insensitive   | 2573              | 93.60% | 401           | 86.99%  |
| Sensitive     | 138               | 5.02%  | 40            | 8.68%   |
| Heterozygous  | 39                | 1.42%  | 20            | 4.34%   |
| Missing       | 1                 | 0.04%  | 0             | 0.00%   |
| <b>VRN-A1</b> |                   |        |               |         |
| Total         | 2748              | 100%   | 461           | 100%    |
| Insensitive   | 2628              | 95.63% | 278           | 60.30%  |
| Sensitive     | 79                | 2.87%  | 163           | 35.36%  |

|               |      |         |     |         |
|---------------|------|---------|-----|---------|
| Heterozygous  | 26   | 0.95%   | 16  | 3.47%   |
| Missing       | 15   | 0.55%   | 4   | 0.87%   |
| <b>VRN-B1</b> |      |         |     |         |
| Total         | 2748 | 100%    | 461 | 100.00% |
| Insensitive   | 2377 | 86.50%  | 264 | 57.27%  |
| Sensitive     | 305  | 11.10%  | 161 | 34.92%  |
| Heterozygous  | 45   | 1.64%   | 22  | 4.77%   |
| Missing       | 21   | 0.76%   | 14  | 3.04%   |
| <b>VRN-D1</b> |      |         |     |         |
| Total         | 2748 | 100%    | 461 | 100.00% |
| Insensitive   | 2660 | 96.80%  | 243 | 52.71%  |
| Sensitive     | 30   | 1.09%   | 177 | 38.39%  |
| Heterozygous  | 16   | 0.58%   | 19  | 4.12%   |
| Missing       | 42   | 1.53%   | 22  | 4.77%   |
| <b>VRN-B3</b> |      |         |     |         |
| Total         | 2748 | 100%    | 461 | 100.00% |
| Insensitive   | 2751 | 100.11% | 1   | 0.22%   |
| Sensitive     | 0    | 0.00%   | 450 | 97.61%  |
| Heterozygous  | 2730 | 99.34%  | 4   | 0.87%   |
| Missing       | 0    | 0.00%   | 6   | 1.30%   |
| <b>Ppd-A1</b> |      |         |     |         |
| Total         | 2748 | 100%    | 461 | 100.00% |
| Insensitive   | 2706 | 98.47%  | 459 | 99.57%  |
| Sensitive     | 9    | 0.33%   | 0   | 0.00%   |
| Heterozygous  | 6    | 0.22%   | 0   | 0.00%   |
| Missing       | 27   | 0.98%   | 2   | 0.43%   |

Table S3: Associations using a two-sided t-test and the p-values for the t-test used to indicate significance of the association among heading and alleles of Ppd and Vrn genes

| Trait              | Term              | Estimate | Std Error | t Ratio | Prob> t  (p-value) | Significance of the association |
|--------------------|-------------------|----------|-----------|---------|--------------------|---------------------------------|
| Delhi Heading      | Intercept         | 90.92    | 2.95      | 30.8    | 4.79E-176          | ***                             |
| Delhi Heading      | Ppd-D1a sensitive | -0.95    | 0.56      | -1.71   | 8.82E-02           | NS                              |
| Delhi Heading      | VRN A1 715 bp     | -0.83    | 1.27      | -0.65   | 5.13E-01           | NS                              |
| Delhi Heading      | VRN D1 dominant   | -4.61    | 2.23      | -2.07   | 3.86E-02           | NS                              |
| Delhi Heading      | VRN-B1 dominant   | 2.20     | 1.08      | 2.03    | 4.21E-02           | NS                              |
| Dharwar Heading    | Intercept         | 62.80    | 2.13      | 29.52   | 7.04E-164          | ***                             |
| Dharwar Heading    | Ppd-D1a sensitive | 5.67     | 0.40      | 14.05   | 3.63E-43           | ***                             |
| Dharwar Heading    | VRN A1 715 bp     | -8.66    | 0.92      | -9.44   | 8.53E-21           | ***                             |
| Dharwar Heading    | VRN D1 dominant   | -1.39    | 1.61      | -0.87   | 3.86E-01           | NS                              |
| Dharwar Heading    | VRN-B1 dominant   | -2.49    | 0.78      | -3.19   | 1.42E-03           | **                              |
| DWR Karnal Heading | Intercept         | 115.53   | 3.08      | 37.45   | 1.34E-242          | ***                             |
| DWR Karnal Heading | Ppd-D1a sensitive | 5.14     | 0.58      | 8.82    | 2.20E-18           | ***                             |
| DWR Karnal Heading | VRN A1 715 bp     | -7.99    | 1.33      | -6.01   | 2.19E-09           | **                              |
| DWR Karnal Heading | VRN D1 dominant   | -1.83    | 2.33      | -0.78   | 4.33E-01           | NS                              |
| DWR Karnal Heading | VRN-B1 dominant   | -3.30    | 1.13      | -2.92   | 3.52E-03           | NS                              |
| Indore Heading     | Intercept         | 129.20   | 1.74      | 74.41   | 0.00E+00           | ***                             |
| Indore Heading     | Ppd-D1a sensitive | 2.95     | 0.33      | 9.02    | 3.72E-19           | ***                             |
| Indore Heading     | VRN A1 715 bp     | 0.47     | 0.76      | 0.62    | 5.35E-01           | NS                              |
| Indore Heading     | VRN D1 dominant   | -3.44    | 1.31      | -2.63   | 8.58E-03           | NS                              |
| Indore Heading     | VRN-B1 dominant   | -0.69    | 0.63      | -1.09   | 2.77E-01           | NS                              |
| Ludhiana Heading   | Intercept         | 107.87   | 2.55      | 42.28   | 1.31E-292          | ***                             |
| Ludhiana Heading   | Ppd-D1a sensitive | 4.73     | 0.48      | 9.8     | 2.89E-22           | ***                             |
| Ludhiana Heading   | VRN A1 715 bp     | -5.14    | 1.09      | -4.71   | 2.68E-06           | **                              |
| Ludhiana Heading   | VRN D1 dominant   | -1.65    | 1.91      | -0.86   | 3.87E-01           | NS                              |
| Ludhiana Heading   | VRN-B1 dominant   | -0.22    | 0.94      | -0.23   | 8.17E-01           | NS                              |
| Obregon Heading    | Intercept         | 87.48    | 3.25      | 26.93   | 6.13E-140          | ***                             |
| Obregon Heading    | Ppd-D1a sensitive | 7.81     | 0.62      | 12.69   | 9.31E-36           | ***                             |
| Obregon Heading    | VRN A1 715 bp     | -11.94   | 1.40      | -8.52   | 2.66E-17           | ***                             |
| Obregon Heading    | VRN D1 dominant   | -2.58    | 2.45      | -1.05   | 2.92E-01           | NS                              |
| Obregon Heading    | VRN-B1 dominant   | -2.88    | 1.19      | -2.42   | 1.56E-02           | NS                              |
| Pune Heading       | Intercept         | 63.07    | 2.40      | 26.23   | 1.03E-133          | ***                             |
| Pune Heading       | Ppd-D1a sensitive | 6.34     | 0.45      | 13.95   | 1.31E-42           | ***                             |
| Pune Heading       | VRN A1 715 bp     | -9.58    | 1.04      | -9.24   | 5.36E-20           | ***                             |
| Pune Heading       | VRN D1 dominant   | -3.03    | 1.81      | -1.67   | 9.52E-02           | NS                              |
| Pune Heading       | VRN-B1 dominant   | -0.56    | 0.88      | -0.63   | 5.28E-01           | NS                              |
